# Supplementary material for: Sociodemographic Factors and Utilization of Pediatric Oncology Satellite Clinics in Ontario, Canada
Source: PubMed Central journal article supplement (PMC11672161; doi:10.1001/jamanetworkopen.2024.52063), 2024-12-26
Supplement: jamanetwopen-e2452063-s001.pdf [file jamanetwopen-e2452063-s001.pdf]

## Supplemental Online Content

Chiu M, Ali A, Leung F, et al. Sociodemographic factors and utilization of pediatric oncology satellite clinics in Ontario, Canada. *JAMA Netw Open*. 2024;7(12):e2452063. doi:10.1001/jamanetworkopen.2024.52063

**eTable.** International Classification of Childhood Cancer (ICCC) Diagnostic groups

**eFigure 1.** The geographic catchment areas around the Pediatric Oncology Group of Ontario's eight satellite clinics

**eFigure 2.** Sensitivity Analysis - Odds ratios for visiting a satellite clinic within one year of diagnosis, adjusted for geographic (distance-saved), socio-demographic and clinical factors, among children and youth diagnosed with a first, primary cancer between April 1, 2015, and March 31, 2022, in Ontario (n=1,280)

**eFigure 3.** Sensitivity Analysis - Hazard ratios for visiting a satellite clinic after starting systemic therapy, adjusted for geographic (distance-saved), socio-demographic and clinical factors, among children and youth diagnosed with a first, primary cancer between April 1, 2015, and March 31, 2022, in Ontario (n=1,253)

This supplemental material has been provided by the authors to give readers additional information about their work.

**eTable. International Classification of Childhood Cancer (ICCC) Diagnostic groups**

|                         |                               |                                                                            |                                                                     |
|-------------------------|-------------------------------|----------------------------------------------------------------------------|---------------------------------------------------------------------|
| Leukemia and lymphoma   | <b>I.</b>                     | <b>Leukemias, myeloproliferative diseases and myelodysplastic diseases</b> |                                                                     |
|                         | a.                            | Lymphoid leukemias                                                         |                                                                     |
|                         | c.                            | Chronic myeloproliferative diseases                                        |                                                                     |
|                         | d.                            | Myelodysplastic syndrome and other myeloproliferative diseases             |                                                                     |
|                         | e.                            | Unspecified and other specified leukemias                                  |                                                                     |
|                         | <b>II.</b>                    | <b>Lymphomas and reticuloendothelial neoplasms</b>                         |                                                                     |
|                         | a.                            | Hodgkin lymphomas                                                          |                                                                     |
|                         | b.                            | Non-Hodgkin lymphomas (except Burkitt lymphoma)                            |                                                                     |
|                         | c.                            | Burkitt lymphoma                                                           |                                                                     |
|                         | d.                            | Miscellaneous lymphoreticular neoplasms                                    |                                                                     |
|                         | e.                            | Unspecified lymphomas                                                      |                                                                     |
|                         | CNS and germ cell CNS tumours | <b>III.</b>                                                                | <b>CNS and miscellaneous intracranial and intraspinal neoplasms</b> |
|                         |                               | a.                                                                         | Ependymomas and choroid plexus tumour                               |
|                         |                               | b.                                                                         | Astrocytomas                                                        |
| c.                      |                               | Intracranial and intraspinal embryonal tumours                             |                                                                     |
| d.                      |                               | Other gliomas                                                              |                                                                     |
| e.                      |                               | Other specified intracranial and intraspinal neoplasms                     |                                                                     |
| f.                      |                               | Unspecified intracranial and intraspinal neoplasms                         |                                                                     |
| <b>X.</b>               |                               | <b>Germ cell tumours, trophoblastic tumours and neoplasms of gonads</b>    |                                                                     |
| a.                      |                               | Intracranial and intraspinal germ cell tumours                             |                                                                     |
| Solid (non-CNS) tumours |                               | <b>IV.</b>                                                                 | <b>Neuroblastoma and other peripheral nervous cell tumours</b>      |
|                         | a.                            | Neuroblastoma and ganglioneuroblastoma                                     |                                                                     |
|                         | b.                            | Other peripheral nervous cell tumours                                      |                                                                     |
|                         | <b>V.</b>                     | <b>Retinoblastoma</b>                                                      |                                                                     |
|                         | <b>VI.</b>                    | <b>Renal tumours</b>                                                       |                                                                     |
|                         | a.                            | Nephroblastoma and other nonepithelial renal tumours                       |                                                                     |
|                         | b.                            | Renal carcinomas                                                           |                                                                     |
|                         | c.                            | Unspecified malignant renal tumours                                        |                                                                     |
|                         | <b>VII.</b>                   | <b>Hepatic tumours</b>                                                     |                                                                     |
|                         | a.                            | Hepatoblastoma                                                             |                                                                     |
|                         | b.                            | Hepatic carcinomas                                                         |                                                                     |
|                         | c.                            | Unspecified malignant hepatic tumours                                      |                                                                     |
|                         | <b>VIII.</b>                  | <b>Malignant bone tumours</b>                                              |                                                                     |
|                         | a.                            | Osteosarcomas                                                              |                                                                     |
|                         | b.                            | Chondrosarcomas                                                            |                                                                     |

|  |             |                                                                            |
|--|-------------|----------------------------------------------------------------------------|
|  | c.          | Ewing tumour and related sarcomas of bone                                  |
|  | d.          | Other specified malignant bone tumours                                     |
|  | e.          | Unspecified malignant bone tumours                                         |
|  | <b>IX.</b>  | <b>Soft tissue and other extrasosseous sarcomas</b>                        |
|  | a.          | Rhabdomyosarcomas                                                          |
|  | b.          | Fibrosarcomas, peripheral nerve sheath tumours and other fibrous neoplasms |
|  | c.          | Kaposi sarcoma                                                             |
|  | d.          | Other specified soft tissue sarcomas                                       |
|  | e.          | Unspecified soft tissue sarcomas                                           |
|  | <b>X.</b>   | <b>Germ cell tumours, trophoblastic tumours and neoplasms of gonads</b>    |
|  | b.          | Malignant extracranial and extragonadal germ cell tumours                  |
|  | c.          | Malignant gonadal germ cell tumours                                        |
|  | d.          | Gonadal carcinomas                                                         |
|  | <b>XI.</b>  | <b>Other malignant epithelial neoplasms and malignant melanomas</b>        |
|  | a.          | Adrenocortical carcinomas                                                  |
|  | b.          | Thyroid carcinomas                                                         |
|  | c.          | Nasopharyngeal carcinomas                                                  |
|  | d.          | Malignant melanomas                                                        |
|  | e.          | Skin carcinomas                                                            |
|  | f.          | Other and unspecified carcinomas                                           |
|  | <b>XII.</b> | <b>Other and unspecified malignant neoplasms</b>                           |
|  | a.          | Other specified malignant tumours                                          |
|  | b.          | Other unspecified malignant tumours                                        |

eFigure 1. The geographic catchment areas around the Pediatric Oncology Group of Ontario's eight satellite clinics.

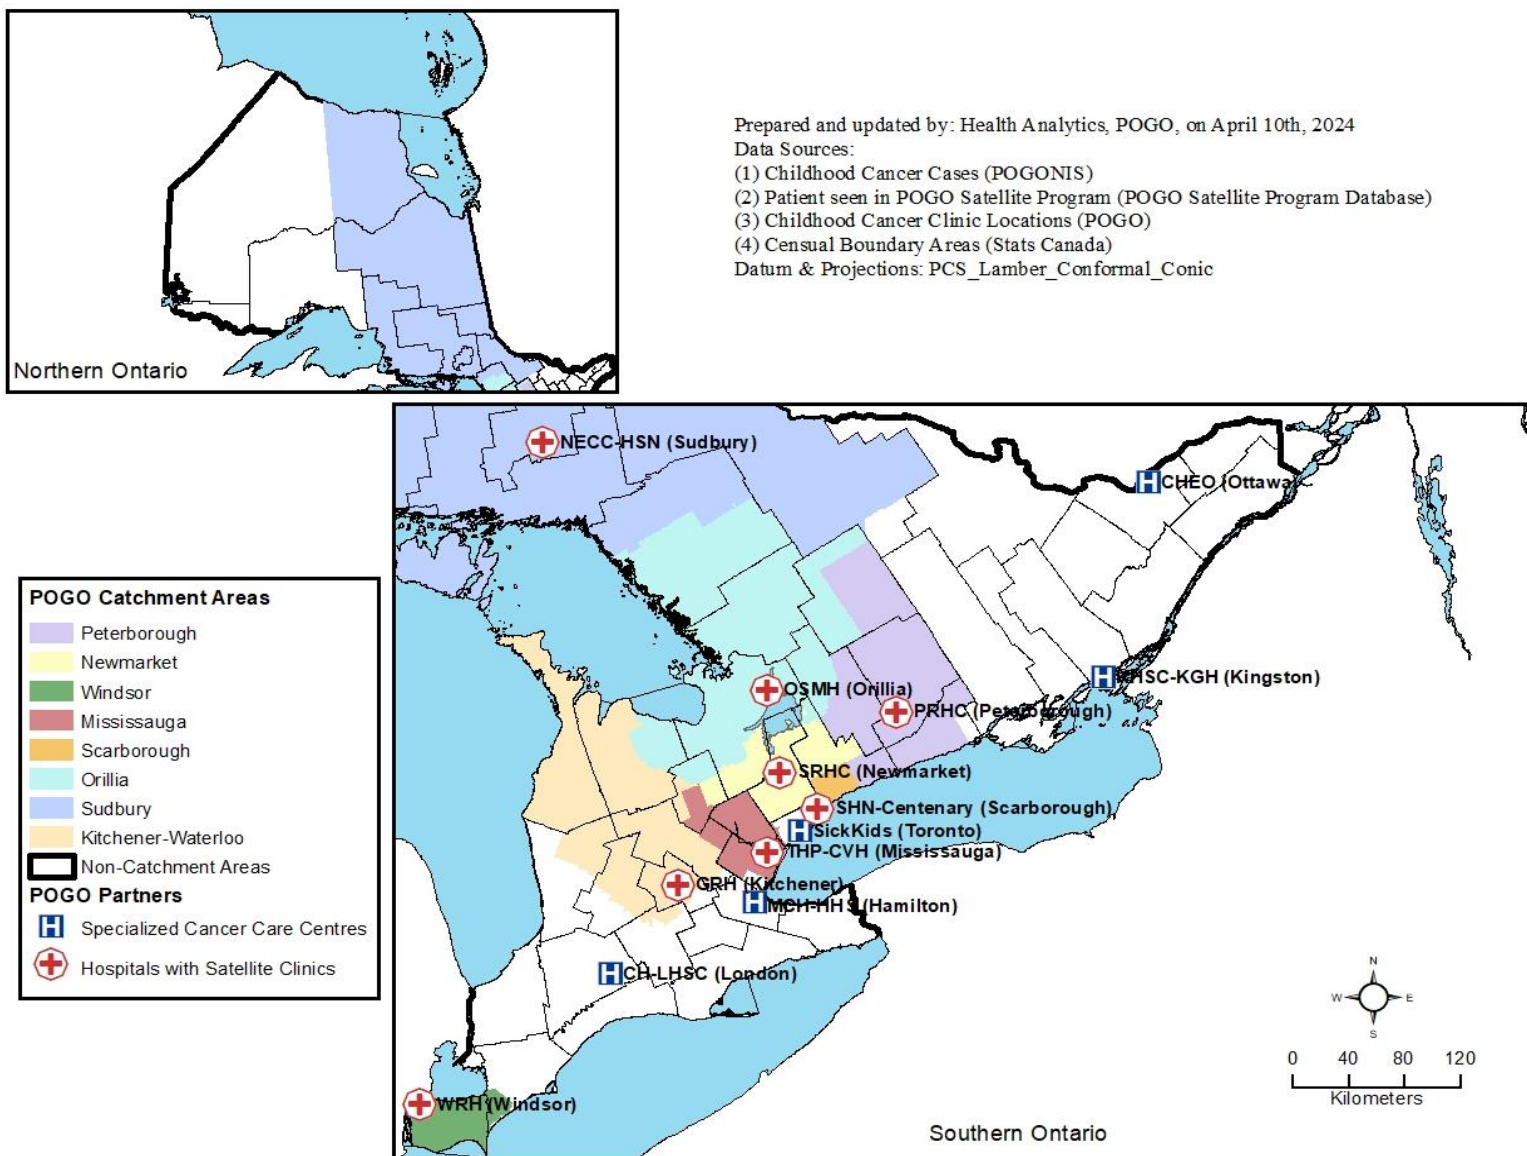

**eFigure 2.** Sensitivity Analysis - Odds ratios for visiting a satellite clinic within one year of diagnosis, adjusted for geographic (distance-saved), socio-demographic and clinical factors, among children and youth diagnosed with a first, primary cancer between April 1, 2015, and March 31, 2022, in Ontario (n=1,280). Odds ratio on graph are presented on a logarithmic scale.

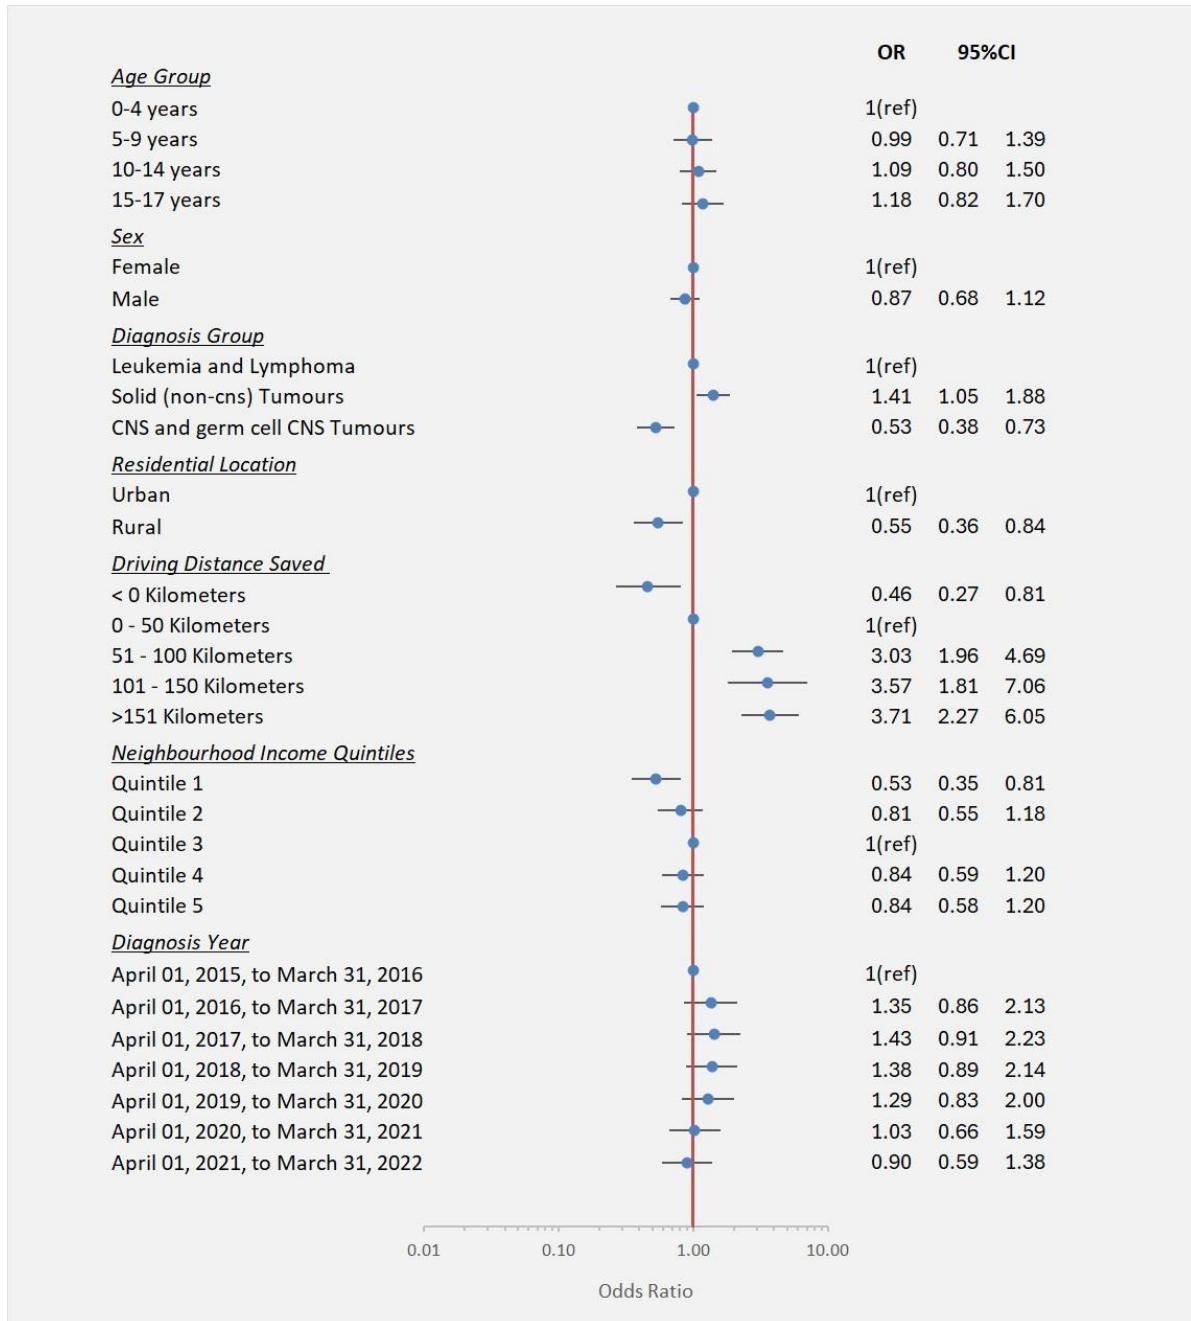

Driving Distance Saved = Shortest driving distance to satellite clinic – Shortest driving distance to specialized pediatric cancer centre. Patients whose driving distance to a specialized pediatric cancer centre is shorter than their driving distance to a satellite clinic will have driving distance saved values <0 km). Neighbourhood income quintile: 1(lowest) and 5(highest).

**eFigure 3.** Sensitivity Analysis - Hazard ratios for visiting a satellite clinic after starting systemic therapy, adjusted for geographic (distance-saved), socio-demographic and clinical factors, among children and youth diagnosed with a first, primary cancer between April 1, 2015, and March 31, 2022, in Ontario (n=1,253). Hazards ratios on the graph are presented on a logarithmic scale.

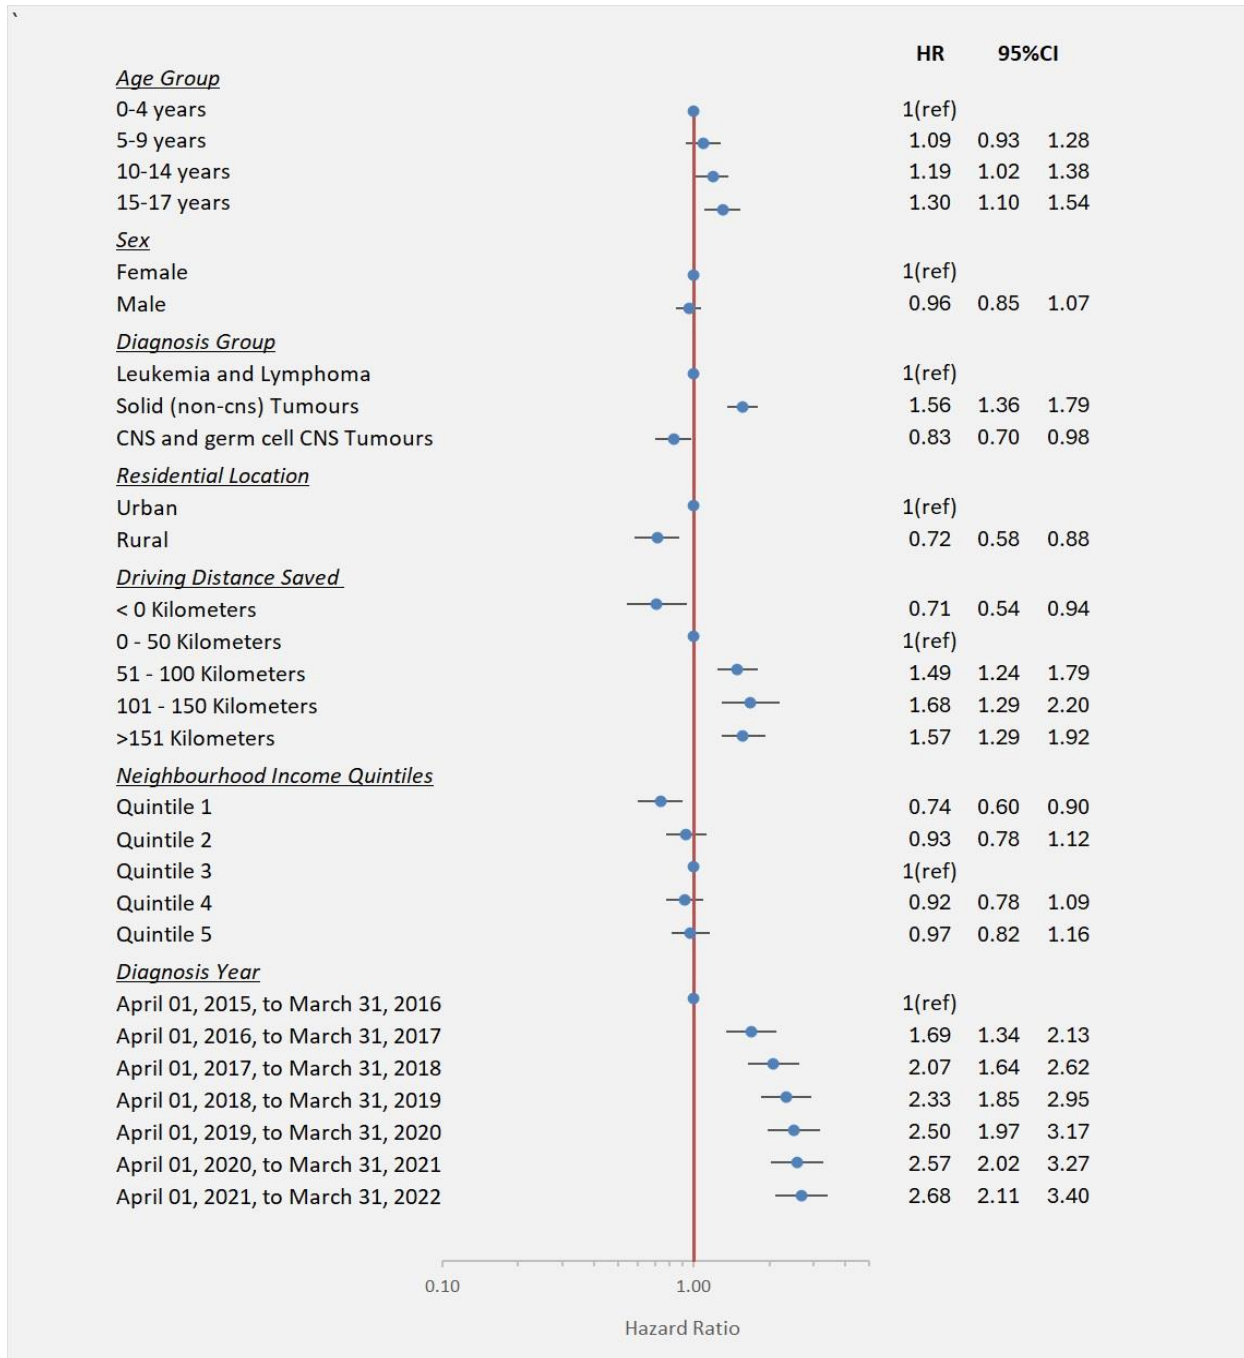

Driving Distance Saved = Shortest driving distance to satellite clinic – Shortest driving distance to specialized pediatric cancer centre. Patients whose driving distance to a specialized pediatric cancer centre is shorter than their driving distance to a satellite clinic will have driving distance saved values <0 km). Neighbourhood income quintile: 1(lowest) and 5(highest).
